# Supplementary material
Source: PubMed Central journal article supplement (PMC5242341)
Supplement: NIHMS840397-supplement-Supplemental.pdf [file NIHMS840397-supplement-Supplemental.pdf]

## SUPPORTING INFORMATION

### **pH-Controlled Gas-Generating Mineralized Nanoparticles: A Theranostic Agent for Ultrasound Imaging and Therapy of Cancers**

**Kyung Hyun Min,<sup>1,2</sup> Hyun Su Min,<sup>1</sup> Hong Jae Lee,<sup>3</sup> Dong Jin Park,<sup>4</sup> Ji Young Yhee,<sup>1</sup>  
Kwangmeyung Kim,<sup>1</sup> Ick Chan Kwon,<sup>1,\*</sup> Seo Young Jeong,<sup>4</sup> Oscar F. Silvestre,<sup>2</sup> Xiaoyuan Chen,<sup>2</sup>  
Yu-Shik Hwang,<sup>3</sup> Eun-Cheol Kim,<sup>5</sup> and Sang Cheon Lee<sup>3,\*</sup>**

<sup>1</sup> Center for Theragnosis, Biomedical Research Institute, Korea Institute of Science and Technology, Seoul 136-791, Republic of Korea

<sup>2</sup> Laboratory of Molecular Imaging and Nanomedicine (LOMIN), National Institute of Biomedical Imaging and Bioengineering (NIBIB), National Institutes of Health (NIH), Bethesda, Maryland 20892, USA.

<sup>3</sup> Department of Maxillofacial Biomedical Engineering & Institute of Oral Biology, School of Dentistry, Kyung Hee University, Seoul 130-701, Republic of Korea

<sup>4</sup> Department of Life and Nanopharmaceutical Science, College of Pharmacy, Kyung Hee University, Seoul 130-701, Republic of Korea

<sup>5</sup> Department of Maxillofacial Tissue Regeneration and Research Center for Tooth and Periodontal Regeneration (MRC), School of Dentistry, Kyung Hee University, Seoul 130-701, Republic of Korea

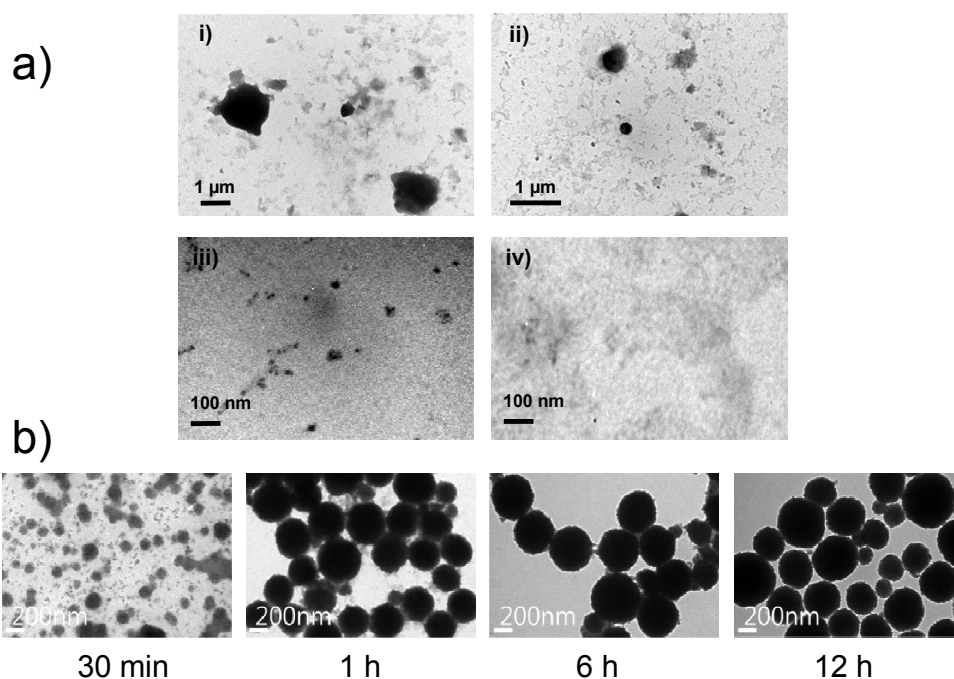

**Figure S1.** a) TEM images of DOX-CaCO<sub>3</sub>-MNPs at various molar feed ratios ([Asp] : [Ca<sup>2+</sup>] : [CO<sub>3</sub><sup>2-</sup>]). i) 1:5:5, ii) 1:2:2, iii) 1:0.5:0.5, and iv) 1:0.2:0.2 (mineralization time: 12 h). b) TEM images of DOX-CaCO<sub>3</sub>-MNPs prepared at feed ratio of [Asp] : [Ca<sup>2+</sup>] : [CO<sub>3</sub><sup>2-</sup>] = 1:1:1 at various mineralization periods.

**Table S1.** Mean hydrodynamic diameter, polydispersity, and morphology of DOX-CaCO<sub>3</sub>-MNPs at various mineralization time.

| Mineralization time (h) | Mean diameter <sup>a</sup> (nm) | Polydispersity factor ( $\mu_2/\Gamma^2$ ) <sup>a</sup> | Morphology <sup>b</sup> |
|-------------------------|---------------------------------|---------------------------------------------------------|-------------------------|
| 0.5                     | 145.2 ± 55.6                    | 0.46 ± 0.13                                             | irregular               |
| 1                       | 180.2 ± 17.2                    | 0.28 ± 0.08                                             | sphere                  |
| 6                       | 217.4 ± 10.8                    | 0.25 ± 0.03                                             | sphere                  |
| 12                      | 240.8 ± 8.1                     | 0.21 ± 0.01                                             | sphere                  |

<sup>a</sup> Measured by dynamic light scattering.

<sup>b</sup> Estimated by TEM.

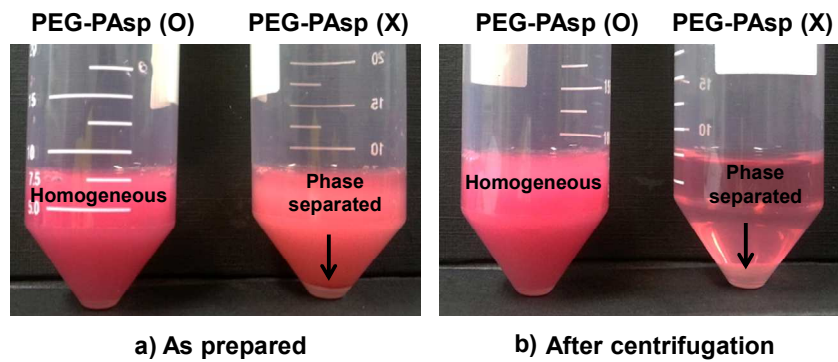

**Figure S2.** Effects of PEG-PAsp on the preparation of stably dispersed DOX-loaded mineralized nanoparticles.

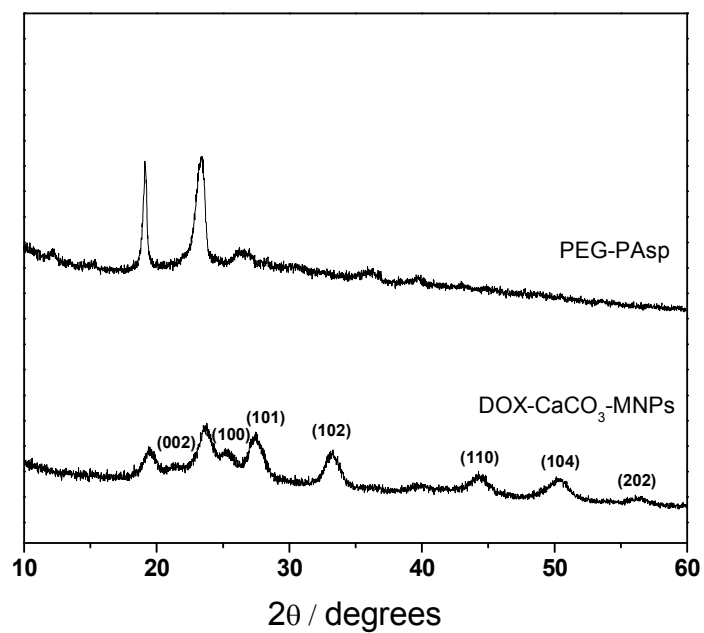

**Figure S3.** The powder XRD pattern of PEG-PAsp and DOX-CaCO<sub>3</sub>-MNPs.

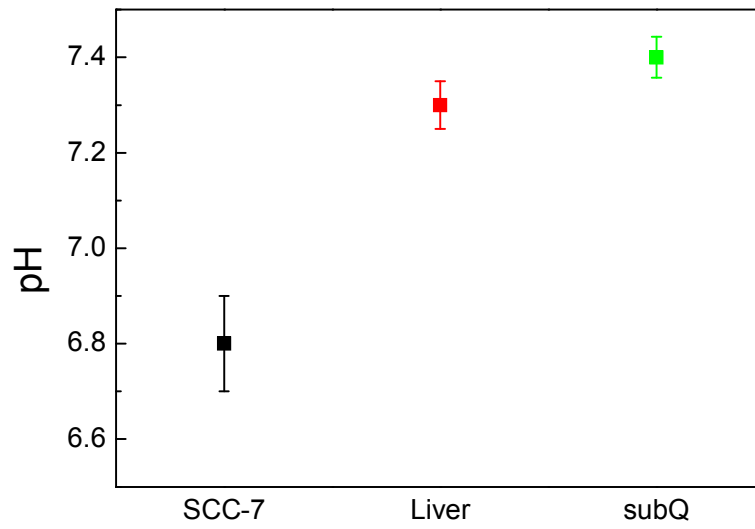

**Figure S4.** pH values of SCC-7 tumors, the liver, and the subcutaneous tissue (subQ).

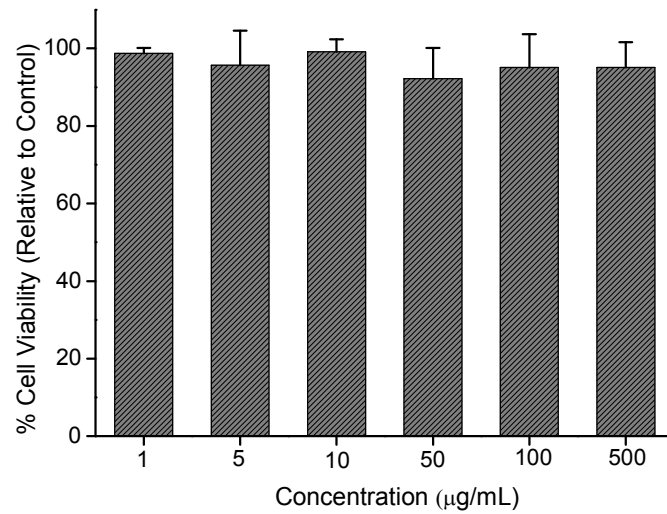

**Figure S5.** Viability of SCC-7 cells at various concentration of DOX-free CaCO<sub>3</sub>-MNPs (n=3).

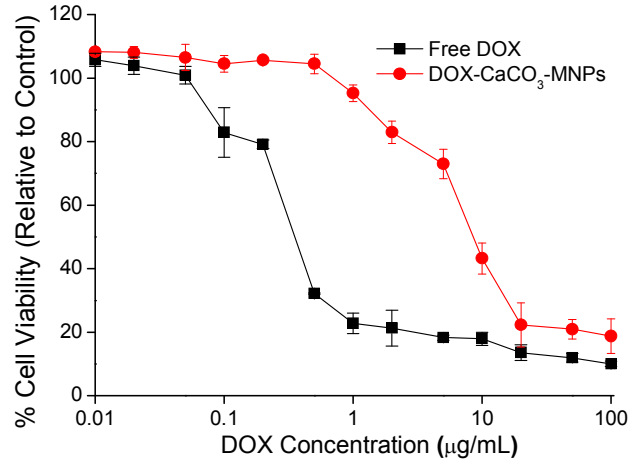

**Figure S6.** *In vitro* cytotoxicity of free DOX and DOX-CaCO<sub>3</sub>-MNPs against SCC-7 cells (n=3).

**Table S2.** IC<sub>50</sub> values of free DOX and DOX-CaCO<sub>3</sub>-MNPs.

| Sample                      | IC <sub>50</sub> (µg/mL) |
|-----------------------------|--------------------------|
| Free DOX                    | 0.27                     |
| DOX-CaCO <sub>3</sub> -MNPs | 5.76                     |

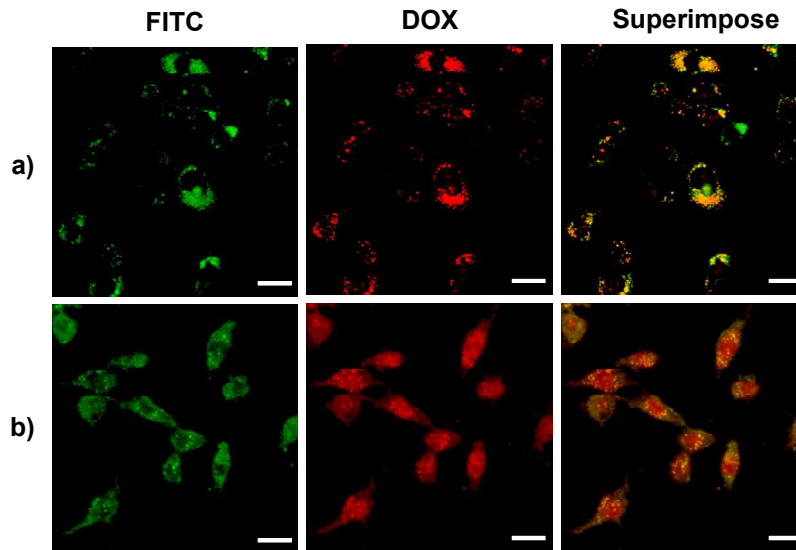

**Figure S7.** CLSM images of live SCC-7 cells treated with FITC-incorporated DOX-CaCO<sub>3</sub>-MNPs (DOX=5 µg/mL). a) after 1 h incubation and b) after 6 h incubation. (Green fluorescence is associated with FITC; the red fluorescence is expressed by free DOX, released DOX, and DOX retained within CaCO<sub>3</sub>-MNPs.). Scale bar: 20 µm.

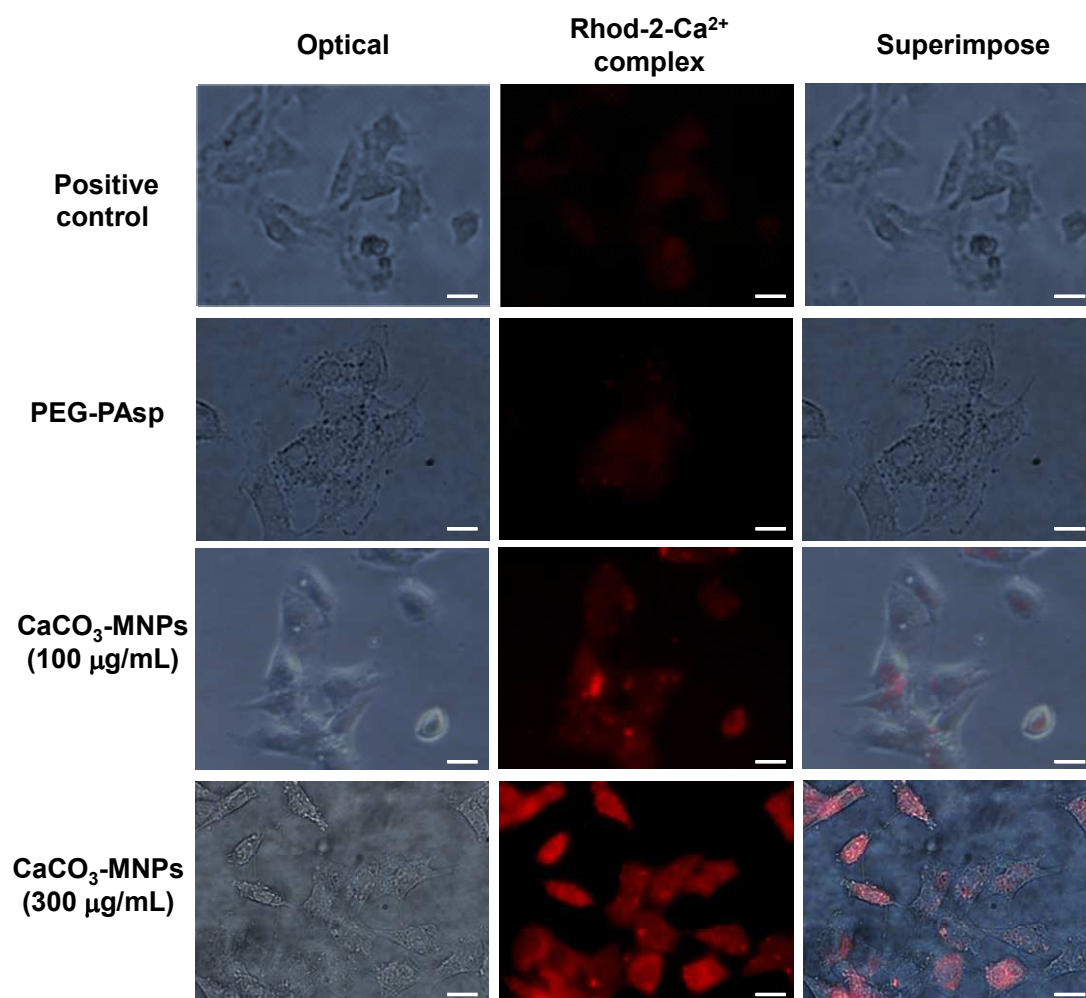

**Figure S8.** Fluorescence image of Rhod-2 labeled SCC-7 cells after the addition of CaCO<sub>3</sub>-MNPs. Scale bar: 20 µm.

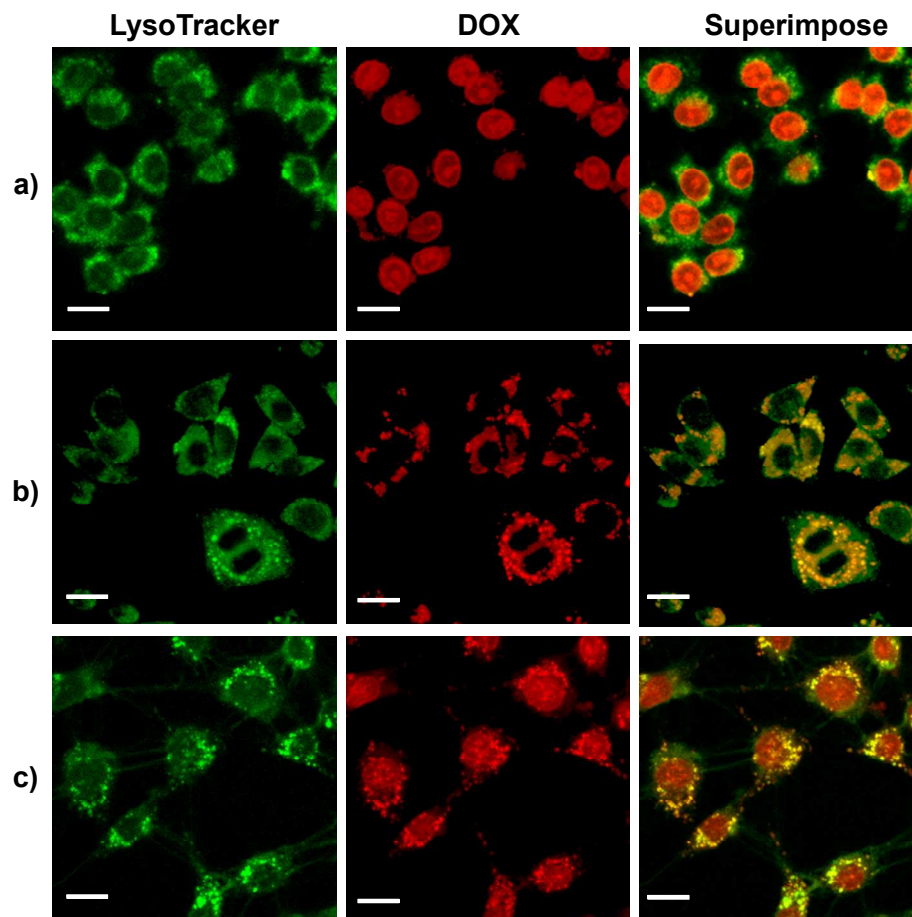

**Figure S9.** CLSM images of live SCC-7 cells treated with LysoTracker (50 nM), free DOX (5  $\mu\text{g}/\text{mL}$ ), and DOX- $\text{CaCO}_3$ -MNPs (DOX=5  $\mu\text{g}/\text{mL}$ ). a) Free DOX for 1 h incubation, b) DOX- $\text{CaCO}_3$ -MNPs for 1 h incubation, c) DOX- $\text{CaCO}_3$ -MNPs for 6 h incubation (Green fluorescence is associated with LysoTracker; the red fluorescence is expressed by free DOX, released DOX, and DOX retained within  $\text{CaCO}_3$ -MNPs.). Scale bar: 20  $\mu\text{m}$ .

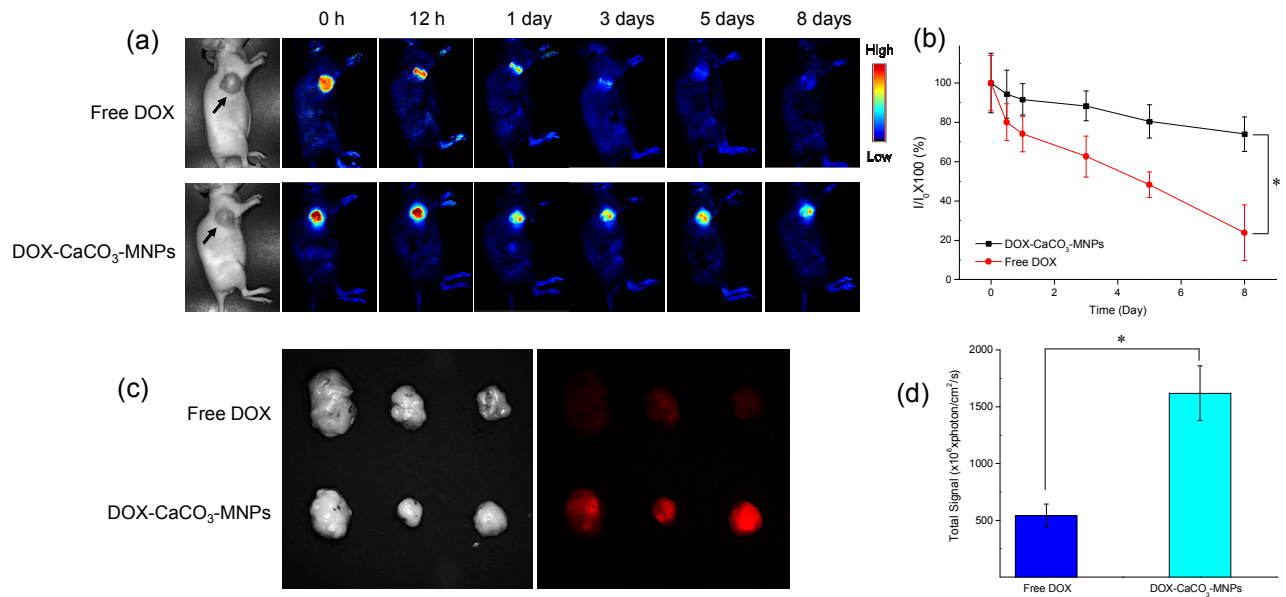

**Figure S10.** a) *In vivo* time-dependent non-invasive fluorescence imaging of SCC-7 tumor-bearing mice after intratumoral injection of free DOX and DOX-CaCO<sub>3</sub>-MNPs. Solid arrows indicate the tumors. b) Time-dependent changes of the ratio of fluorescence intensities ( $I/I_0$ ) as a function of time, where  $I$  and  $I_0$  indicate the fluorescence intensity of the tumor at pre-determined time intervals and the fluorescence intensity of the tumor immediately after injection, respectively. c) *Ex vivo* fluorescence imaging of isolated tumors from three mice at 8 days post-injection of free DOX and DOX-CaCO<sub>3</sub>-MNPs. d) Quantification of total fluorescence photon counts per each tumor ( $n = 3$  mice per group) treated with free DOX or DOX-CaCO<sub>3</sub>-MNPs. \* $P < 0.01$ .
